# Supplementary material
Source: publisher site journal article supplement (https://kjim.org/upload/media/kjim-2023-358-Supplementary-Table-1.pdf)
Supplement: Supplementary file 1 [file kjim-2023-358-Supplementary-Table-1.pdf]

**Supplementary Table 1. Characteristics and assessments of 70 duodenal subepithelial lesions which were evaluated using endoscopic ultrasound**

| No. | Initial size (mm) | Location       | Layer of origin | Ultrasound assessment       | Pathologic Dx               | Substantial change | Total follow-up duration (mo) |
|-----|-------------------|----------------|-----------------|-----------------------------|-----------------------------|--------------------|-------------------------------|
| 1   | 6                 | Second portion | MM              | Brunner's gland hyperplasia | Brunner's gland hyperplasia | No                 | 88.1                          |
| 2   | 7                 | Second portion | SM              | Brunner's gland hyperplasia | No pathology                | Yes                | 126.3                         |
| 3   | 8                 | Second portion | MM              | Brunner's gland hyperplasia | No pathology                | No                 | 25.7                          |
| 4   | 8                 | Second portion | SM              | Brunner's gland hyperplasia | No pathology                | No                 | 71.3                          |
| 5   | 10                | Second portion | SM              | Brunner's gland hyperplasia | Brunner's gland hyperplasia | No                 | 46.6                          |
| 6   | 10                | Second portion | SM              | Brunner's gland hyperplasia | No pathology                | No                 | 19.3                          |
| 7   | 10                | Second portion | SM              | Brunner's gland hyperplasia | No pathology                | No                 | 80.5                          |
| 8   | 10                | Bulb           | MM              | Brunner's gland hyperplasia | No pathology                | No                 | 39.9                          |
| 9   | 10                | Bulb           | SM              | Brunner's gland hyperplasia | No pathology                | No                 | 69.0                          |
| 10  | 10                | Bulb           | SM              | Brunner's gland hyperplasia | No pathology                | No                 | 7.1                           |
| 11  | 12                | Second portion | SM              | Brunner's gland hyperplasia | No pathology                | Yes                | 134.6                         |
| 12  | 12                | Second portion | MM              | Brunner's gland hyperplasia | No pathology                | No                 | 21.1                          |
| 13  | 15                | Second portion | SM              | Brunner's gland hyperplasia | NonDx                       | No                 | 13.6                          |
| 14  | 16                | Bulb           | SM              | Brunner's gland hyperplasia | NonDx                       | No                 | 58.7                          |
| 15  | 18                | Bulb           | SM              | Brunner's gland hyperplasia | No pathology                | No                 | 84.1                          |
| 16  | 20                | Second portion | MM              | Brunner's gland hyperplasia | No pathology                | No                 | 23.2                          |
| 17  | 5                 | Second portion | SM              | Cystic lesion               | No pathology                | No                 | 121.0                         |
| 18  | 5                 | Second portion | SM              | Cystic lesion               | No pathology                | No                 | 62.1                          |
| 19  | 10                | Third portion  | SM              | Cystic lesion               | No pathology                | No                 | 24.1                          |
| 20  | 10                | Second portion | SM              | Cystic lesion               | No pathology                | No                 | 194.8                         |
| 21  | 10                | Bulb           | SM              | Cystic lesion               | No pathology                | No                 | 37.3                          |
| 22  | 13                | Second portion | SM              | Cystic lesion               | No pathology                | No                 | 6.1                           |
| 23  | 15                | Bulb           | SM              | Cystic lesion               | No pathology                | Yes                | 103.4                         |
| 24  | 8                 | Second portion | MP              | Heterotopic pancreas        | No pathology                | No                 | 204.8                         |
| 25  | 10                | Bulb           | MP              | Heterotopic pancreas        | No pathology                | No                 | 117.1                         |
| 26  | 10                | Bulb           | MP              | Heterotopic pancreas        | NonDx                       | No                 | 174.7                         |
| 27  | 10                | Bulb           | MP              | Heterotopic pancreas        | No pathology                | No                 | 65.8                          |
| 28  | 10                | Second portion | SM              | Heterotopic pancreas        | No pathology                | No                 | 98.1                          |
| 29  | 10                | Bulb           | SM              | Heterotopic pancreas        | Heterotopic pancreas        | Yes                | 55.2                          |
| 30  | 10                | Second portion | MM              | Heterotopic pancreas        | No pathology                | No                 | 58.4                          |
| 31  | 10                | Bulb           | SM              | Heterotopic pancreas        | No pathology                | No                 | 18.3                          |
| 32  | 10                | Bulb           | MM              | Heterotopic pancreas        | No pathology                | No                 | 7.0                           |
| 33  | 11                | Second portion | MM              | Heterotopic pancreas        | No pathology                | No                 | 79.8                          |
| 34  | 12                | Bulb           | SM              | Heterotopic pancreas        | No pathology                | No                 | 77.2                          |
| 35  | 12                | Second portion | SM              | Heterotopic pancreas        | No pathology                | No                 | 20.4                          |
| 36  | 12                | Bulb           | SM              | Heterotopic pancreas        | No pathology                | No                 | 20.4                          |
| 37  | 13                | Bulb           | MP              | Heterotopic pancreas        | No pathology                | No                 | 100.6                         |
| 38  | 14                | Second portion | SM              | Heterotopic pancreas        | No pathology                | No                 | 127.4                         |
| 39  | 15                | Second portion | SM              | Heterotopic pancreas        | No pathology                | No                 | 6.2                           |

Supplementary Table 1. Continued

| No. | Initial size (mm) | Location       | Layer of origin | Ultrasound assessment                       | Pathologic Dx        | Substantial change | Total follow-up duration (mo) |
|-----|-------------------|----------------|-----------------|---------------------------------------------|----------------------|--------------------|-------------------------------|
| 40  | 15                | Second portion | SM              | Heterotopic pancreas                        | No pathology         | No                 | 82.7                          |
| 41  | 15                | Second portion | MM              | Heterotopic pancreas                        | No pathology         | No                 | 54.9                          |
| 42  | 15                | Second portion | MM              | Heterotopic pancreas                        | No pathology         | No                 | 122.6                         |
| 43  | 15                | Bulb           | MP              | Heterotopic pancreas                        | No pathology         | No                 | 61.6                          |
| 44  | 16                | Second portion | SM              | Heterotopic pancreas                        | Heterotopic pancreas | No                 | 74.7                          |
| 45  | 18                | Second portion | SM              | Heterotopic pancreas                        | No pathology         | No                 | 41.7                          |
| 46  | 20                | Second portion | SM              | Heterotopic pancreas                        | No pathology         | No                 | 204.1                         |
| 47  | 20                | Bulb           | SM              | Heterotopic pancreas                        | No pathology         | No                 | 7.0                           |
| 48  | 20                | Bulb           | SM              | Heterotopic pancreas                        | No pathology         | No                 | 61.0                          |
| 49  | 20                | Bulb           | MP              | Heterotopic pancreas                        | No pathology         | No                 | 45.7                          |
| 50  | 20                | Second portion | MP              | Heterotopic pancreas                        | Heterotopic pancreas | No                 | 13.8                          |
| 51  | 20                | Bulb           | SM              | Heterotopic pancreas                        | No pathology         | No                 | 17.9                          |
| 52  | 21                | Bulb           | SM              | Heterotopic pancreas                        | No pathology         | No                 | 7.3                           |
| 53  | 7                 | Second portion | SM              | Lipoma                                      | No pathology         | No                 | 83.5                          |
| 54  | 10                | Second portion | SM              | Lipoma                                      | No pathology         | No                 | 72.0                          |
| 55  | 12                | Bulb           | SM              | Lipoma                                      | No pathology         | No                 | 47.8                          |
| 56  | 14                | Second portion | SM              | Lipoma                                      | No pathology         | No                 | 127.9                         |
| 57  | 15                | Second portion | MP              | Lipoma                                      | Lipoma               | Yes                | 33.8                          |
| 58  | 16                | Bulb           | SM              | Lipoma                                      | No pathology         | No                 | 116.0                         |
| 59  | 18                | Second portion | SM              | Lipoma                                      | No pathology         | No                 | 94.9                          |
| 60  | 18                | Second portion | SM              | Lipoma                                      | No pathology         | No                 | 130.0                         |
| 61  | 20                | Second portion | SM              | Lipoma                                      | Lipoma               | Yes                | 34.0                          |
| 62  | 7                 | Third portion  | MP              | Mesenchymal tumor such as leiomyoma or GIST | No pathology         | No                 | 30.9                          |
| 63  | 10                | Bulb           | MP              | Mesenchymal tumor such as leiomyoma or GIST | No pathology         | No                 | 86.4                          |
| 64  | 12                | Bulb           | MP              | Mesenchymal tumor such as leiomyoma or GIST | No pathology         | No                 | 77.0                          |
| 65  | 12                | Second portion | MP              | Mesenchymal tumor such as leiomyoma or GIST | NonDx                | Yes                | 124.0                         |
| 66  | 14                | Bulb           | MP              | Mesenchymal tumor such as leiomyoma or GIST | No pathology         | No                 | 61.0                          |
| 67  | 15                | Second portion | MP              | Mesenchymal tumor such as leiomyoma or GIST | GIST                 | Yes                | 101.9                         |
| 68  | 18                | Third portion  | MP              | Mesenchymal tumor such as leiomyoma or GIST | NonDx                | No                 | 98.4                          |
| 69  | 20                | Second portion | MP              | Mesenchymal tumor such as leiomyoma or GIST | No pathology         | No                 | 18.9                          |
| 70  | 24                | Bulb           | MP              | Mesenchymal tumor such as leiomyoma or GIST | GIST                 | Yes                | 10.6                          |

Dx, diagnosis; MM, muscularis mucosae; SM, submucosa; NonDx, non-diagnostic; MP, muscularis propria; GIST, gastrointestinal stromal tumor.
